# Supplementary material for: At the crossroads of botanical collections and molecular genetics laboratory: a preliminary study of obtaining amplifiable DNA from moss herbarium material
Source: PeerJ. 2020 May 26;8:e9109. doi: 10.7717/peerj.9109 (PMC7258893; doi:10.7717/peerj.9109)
Supplement: Supplemental Information 4 [file peerj-08-9109-s004.xlsx]

## Sheet: DNA conc. on PCR success
The Kolmogorov-Smirnov test
The null hypothesis H0	that F0,000-1,630 = F1,710-8,780 (no correlation exist)
	Number of successfully amplified regions	DNA concentration group (0,000-1,630 ng/μl)	DNA concentration group (1,710-8,780 ng/μl)	K (0,000-1,630 ng/μl)	K (1,710-8,780 ng/μl)	F (0,000-1,630 ng/μl)	F (1,710-8,780 ng/μl)	F (0,000-1,630 ng/μl) - F (1,710-8,780 ng/μl)
	0	3	4	3	4	0.230769	0.333333	-0.102564
	1	1	0	4	4	0.307692	0.333333	-0.025641
	2	0	1	4	5	0.307692	0.416667	-0.108974
	3	3	0	7	5	0.538462	0.416667	0.121795
	4	0	1	7	6	0.538462	0.5	0.0384615
	5	0	1	7	7	0.538462	0.583333	-0.0448718
	6	1	1	8	8	0.615385	0.666667	-0.0512821
	7	1	0	9	8	0.692308	0.666667	0.025641
	8	1	1	10	9	0.769231	0.75	0.0192308
	9	2	3	12	12	0.923077	1	-0.0769231
	10	1	0	13	12	1	1	0
	Dn = max |F0,000-1,630 - F1,710-8,780|	Critical values and Confidence levels for K-S Two Sample Test
	Dn = 0,122	α	Dn(α)
		0.05	1.358
	Dα = 0,544	0.543635
	Because Dn < Dα we may accept the null hypothesis at the 95% confidence level.

## Sheet: Age of specimen on PCR success
The Kolmogorov-Smirnov test
The null hypothesis H0	that F8-15 = F19-35 (no correlation exist)
	Number of successfully amplified regions	Age group (8-15)	Age group (19-35)	K (8-15)	K (19-35)	F (8-15)	F (19-35)	F (8-15) - F(19-35)
	0	4	3	4	3	0.285714	0.272727	0.012987
	1	0	1	4	4	0.285714	0.363636	-0.0779221
	2	0	1	4	5	0.285714	0.454545	-0.168831
	3	1	2	5	7	0.357143	0.636364	-0.279221
	4	1	0	6	7	0.428571	0.636364	-0.207792
	5	0	1	6	8	0.428571	0.727273	-0.298701
	6	1	1	7	9	0.5	0.818182	-0.318182
	7	1	0	8	9	0.571429	0.818182	-0.246753
	8	2	0	10	9	0.714286	0.818182	-0.103896
	9	4	1	14	10	1	0.909091	0.0909091
	10	0	1	14	11	1	1	0
	Dn = max |F8-15 - F19-35|	Critical values and Confidence levels for K-S Two Sample Test
	Dn = 0,318	α	Dn(α)
		0.05	1.358
	Dα = 0,547	0.547154
	Because Dn < Dα we may accept the null hypothesis at the 95% confidence level.

## Sheet: Median_DNA conc & age
No.	DNA concentration [ng/μl]			No.	age of the specimen in the year of DNA extraction
1	0			1	8
2	0			2	8
3	0.256			3	8
4	0.396			4	8
5	0.466			5	8
6	0.594			6	8
7	0.722			7	8
8	0.89			8	8
9	1.12			9	8
10	1.31			10	15
11	1.31			11	15
12	1.43			12	15
13	1.63			13	15
14	1.71			14	15
15	1.72			15	19
16	1.81			16	19
17	1.92			17	19
18	2.18			18	25
19	3.34			19	34
20	3.4			20	34
21	3.8			21	34
22	4			22	34
23	4.06			23	34
24	4.78			24	34
25	8.78			25	35
	1.63				15

## Sheet: Linear regression
No	Age of the specimen in the year of DNA extraction (X)	Number of successfully amplified regions (Y)	XY	X2	Y2		The null hypothesis H0 - no correlation exist
1	8	0	512	64	0		Σx2	2809.04
2	8	8	64	64	64		Σy2	334.16
3	8	3	24	64	9		Σxy	447.08
4	8	9	72	64	81		b	0.159158
5	8	9	72	64	81		a1	1.46057
6	8	0	0	64	0		ν	0.344904
7	8	9	72	64	81		a2	-2.0166
8	8	8	64	64	64		r	0.461455
9	8	0	0	64	0		Σy2p	71.1562	df=1
10	15	6	90	225	36		Σd2	263.004	df=N-2
11	15	9	135	225	81				df=25-2
12	15	7	105	225	49				df=23
13	15	4	60	225	16		F	6.22269
14	15	0	0	225	0		F0,05;1;23	4.28
15	19	0	0	361	0
16	19	0	0	361	0		F > F0,05;1;23
17	19	3	57	361	9
18	25	3	75	625	9		Because F > F0,05;1;23 we may reject the null hypothesis at 95% confidence level.
19	34	2	68	1156	4
20	34	0	0	1156	0
21	34	9	306	1156	81
22	34	5	170	1156	25
23	34	6	204	1156	36
24	34	10	340	1156	100
25	35	1	35	1225	1
Σ	468	111	2525	11570	827
No	DNA concentration (ng/μl) (X)	Number of successfully amplified regions (Y)	XY	X2	Y2		The null hypothesis H0 - no correlation exist
1	0	0	0	0	0		Σx2	92.066
2	0	0	0	0	0		Σy2	334.16
3	1.31	0	0	1.7161	0		Σxy	-31.4086
4	4	0	0	16	0		b	-0.341153
5	4.06	0	0	16.4836	0		a1	5.14447
6	4.78	0	0	22.8484	0		ν	1.90514
7	8.78	0	0	77.0884	0		a2	0.505956
8	0.466	1	0.466	0.217156	1		r	-0.179069
9	1.72	2	3.44	2.9584	4		Σy2p	10.7151	df=1
10	0.256	3	0.768	0.065536	9		Σd2	323.445	df=N-2
11	0.594	3	1.782	0.352836	9				df=25-2
12	1.63	3	4.89	2.6569	9				df=23
13	1.81	4	7.24	3.2761	16		F	0.761946
14	2.18	5	10.9	4.7524	25		F0,05;1;23	4.28
15	0.722	6	4.332	0.521284	36
16	1.92	6	11.52	3.6864	36		F < F0,05;1;23
17	1.31	7	9.17	1.7161	49
18	0.89	8	7.12	0.7921	64		Because F < F0,05;1;23 we may accept the null hypothesis at 95% confidence level.
19	1.71	8	13.68	2.9241	64
20	0.396	9	3.564	0.156816	81
21	1.43	9	12.87	2.0449	81
22	3.34	9	30.06	11.1556	81
23	3.4	9	30.6	11.56	81
24	3.8	9	34.2	14.44	81
25	1.12	10	11.2	1.2544	100
Σ	51.624	111	197.802	198.668	827
