# Supplementary material for: At the crossroads of botanical collections and molecular genetics laboratory: a preliminary study of obtaining amplifiable DNA from moss herbarium material
Source: PeerJ. 2020 May 26;8:e9109. doi: 10.7717/peerj.9109 (PMC7258893; doi:10.7717/peerj.9109)
Supplement: Supplemental Information 5 [file peerj-08-9109-s005.xlsx]

## Sheet: DNA conc. 
No	DNA concentration [ng/μl]
1	0		1.63
2	0		8.78
3	0.256
4	0.396
5	0.466
6	0.594
7	0.722
8	0.89
9	1.12
10	1.31
11	1.31
12	1.43
13	1.63	median
14	1.71
15	1.72
16	1.81
17	1.92
18	2.18
19	3.34
20	3.4
21	3.8
22	4
23	4.06
24	4.78
25	8.78
Number of classes	Boundaries of the intervals			Size	Frequency	Frequency %
1	0,0-1,5			12	0.48	48
2	1,5-3,0			6	0.24	24
3	3,0-4,5			5	0.2	20
4	4,5-6,0			1	0.04	4
5	6,0-7,5			0	0	0
6	7,5-9,0			1	0.04	4
				25	1	100
Boundaries of the intervals	Frequency
0,0-1,5	0.48
1,5-3,0	0.24
3,0-4,5	0.2
4,5-6,0	0.04
6,0-7,5	0
7,5-9,0	0.04
